# Supplementary material
Source: publisher figshare collection journal article supplement (https://acs.figshare.com/ndownloader/files/11878565)
Supplement: Supplementary file 1 [file 11878565]

# Second Harmonic Generation Optical Rotation Solely Attributable to Chirality in Plasmonic Metasurfaces

## Supporting Information

*Joel T. Collins<sup>1</sup>, David C. Hooper<sup>1</sup>, Andrew G. Mark<sup>2</sup>, Christian Kuppe<sup>1</sup>, and Ventsislav K. Valev<sup>1\*</sup>*

<sup>1</sup>Centre for Photonics and Photonic Materials, and Centre for Nanoscience and Nanotechnology,  
University of Bath, Bath, BA2 7AY, United Kingdom

<sup>2</sup>Max Planck Institute for Intelligent Systems, Heisenbergstr. 3, 70569 Stuttgart, Germany



## Supporting Information 1. Identifying Chirality Tensor Components

A reflection in the  $x$ - $z$  plane can be described by the transformation matrix given in equation (1).

$$A_{ij}^y = \begin{bmatrix} -1 & 0 & 0 \\ 0 & 1 & 0 \\ 0 & 0 & 1 \end{bmatrix} \quad (1)$$

This reflection can then be applied to the nonlinear susceptibility tensor  $\chi_{ijk}^{(2)}$  by equation (2).

$$\chi'_{ijk}{}^{(2)} = A_{i\alpha}^y A_{j\beta}^y A_{k\gamma}^y \chi_{\alpha\beta\gamma}^{(2)} \quad (2)$$

Under mirror symmetry in the  $y$ - $z$  plane, the nonlinear susceptibility tensor  $\chi_{ijk}^{(2)}$  should remain unchanged under this transformation, and so we impose the equality given in equation (3).

$$A_{i\alpha}^y A_{j\beta}^y A_{k\gamma}^y \chi_{\alpha\beta\gamma}^{(2)} = \chi_{ijk}^{(2)} \quad (3)$$

For a general second-order susceptibility tensor with no rotational symmetry, this equality forces components to zero, so that  $\chi_{ijk}^{(2)}$  with  $y$ - $z$  mirror symmetry reduces to equation (4).

$$\chi_{ijk}^{(2)} = \begin{bmatrix} 0 & 0 & 0 & 0 & 0 & \chi_{xzx} & \chi_{xxz} & \chi_{xxy} & \chi_{xyx} \\ \chi_{yxx} & \chi_{yyy} & \chi_{yzz} & \chi_{yyz} & \chi_{yzy} & 0 & 0 & 0 & 0 \\ \chi_{zxx} & \chi_{zyy} & \chi_{zzz} & \chi_{zyz} & \chi_{zzx} & 0 & 0 & 0 & 0 \end{bmatrix} \quad (4)$$

In the case of indistinguishable incident fields, permutation symmetry applies, and this reduces further to equation (5)

$$d_{il} = \begin{pmatrix} 0 & 0 & 0 & 0 & \chi_{xzx} & \chi_{xyx} \\ \chi_{yxx} & \chi_{yyy} & \chi_{yzz} & \chi_{yzy} & 0 & 0 \\ \chi_{zxx} & \chi_{zyy} & \chi_{zzz} & \chi_{zyz} & 0 & 0 \end{pmatrix} \quad (5)$$

This reveals the susceptibility tensor components that exclusively appear in chiral structures.
